# Supplementary material for: Evaluation of the Sequential Spot Sampler (S3) for time-resolved measurement of PM 2.5 sulfate and nitrate through lab and field measurements
Source: Copernicus journal article supplement (doi:10.5194/amt-9-525-2016), 2016-02-16
Supplement: Supplementary file 1 [file amt-9-525-2016-supplement.pdf]

Supplement of Atmos. Meas. Tech., 9, 525–533, 2016  
<http://www.atmos-meas-tech.net/9/525/2016/>  
doi:10.5194/amt-9-525-2016-supplement  
© Author(s) 2016. CC Attribution 3.0 License.

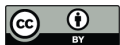

*Supplement of*

## **Evaluation of the Sequential Spot Sampler (S3) for time-resolved measurement of PM<sub>2.5</sub> sulfate and nitrate through lab and field measurements**

**A. Hecobian et al.**

*Correspondence to:* A. Hecobian (arsineh@colostate.edu)

The copyright of individual parts of the supplement might differ from the CC-BY 3.0 licence.

1 **SUPPLEMENTARY MATERIAL:**

2

3 Linear regression residual plots for all comparisons in Figure 6 are shown in Figure S1.

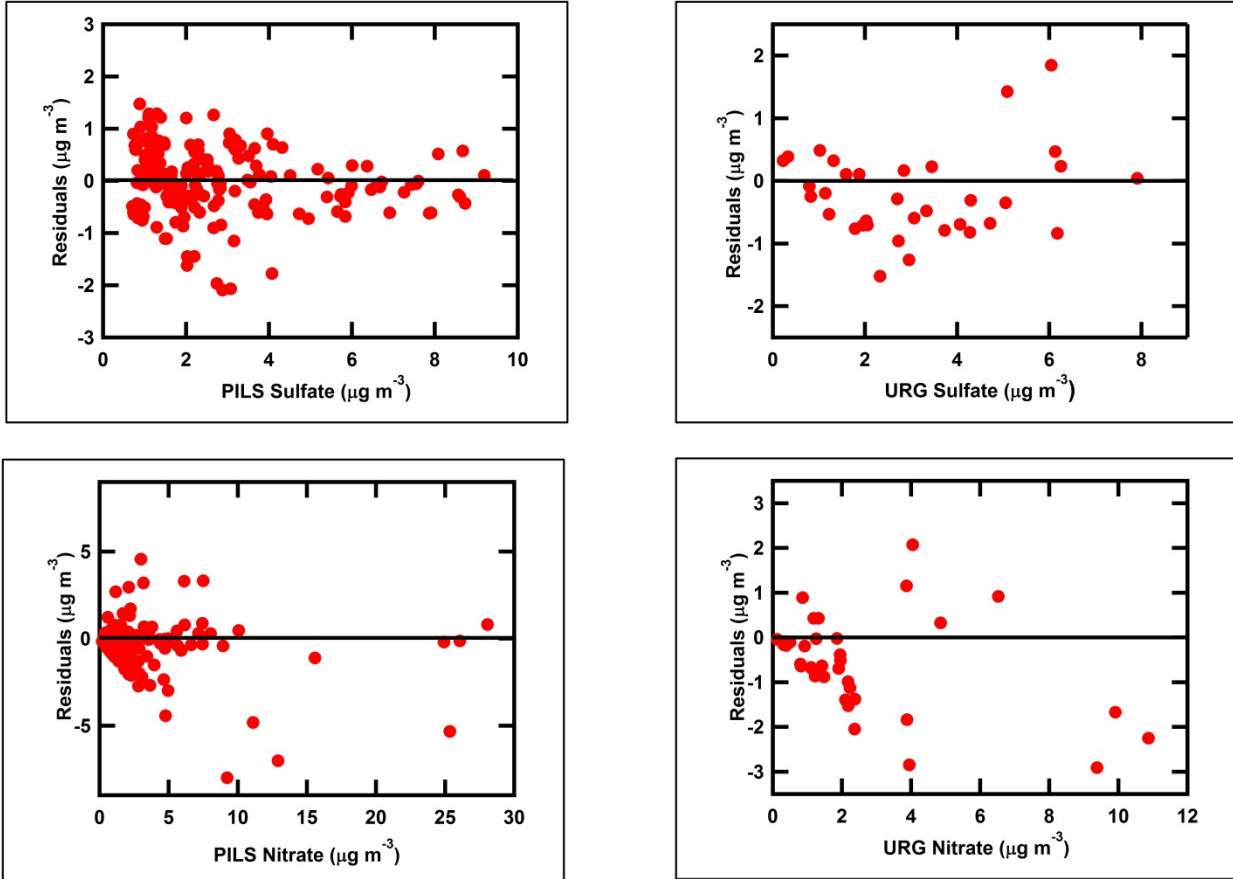

4

5 Figure S1. Residuals for the comparison of S3 sulfate (top panel) and nitrate (bottom  
6 panel) to PILS and URG are presented.
